# Supplementary material
Source: ML conference proceedings conference paper supplement (https://proceedings.mlr.press/v37/lian15.html)
Supplement: Supplementary file 1 [file lian15-supp.pdf]

---

## Supplemental Material of ‘‘A Multitask Point Process Predictive Model’’

---

Wenzhao Lian<sup>1</sup>  
 Ricardo Henao<sup>1</sup>  
 Vinayak Rao<sup>2</sup>  
 Joseph Lucas<sup>3</sup>  
 Lawrence Carin<sup>1</sup>

WL89@DUKE.EDU  
 R.HENAO@DUKE.EDU  
 VARAO@PURDUE.EDU  
 JOE@STAT.DUKE.EDU  
 LCARIN@DUKE.EDU

<sup>1</sup>Department of Electrical and Computer Engineering, Duke University, Durham, NC 27708, USA

<sup>2</sup>Department of Statistics, Purdue University, West Lafayette, IN 47907, USA

<sup>3</sup>Center for Predictive Medicine, Duke Clinical Research Institute, Durham, NC 27708, USA

### 1. Key quantities in variational inference

#### Variational E-step:

$$\frac{d\mathcal{F}_1}{d\boldsymbol{\mu}^u} = \sum_{u=1}^U \sum_{i=1}^{N^u} \left\{ -\Delta_i^u \left[ 2b_i^u \mathbf{K}_{MM}^{-1} \mathbf{K}_{NM,i\cdot}^u \right]^\top + \mathbb{I}(t_i^u \in \mathcal{T}^u) \left[ \tilde{G}' \left( -\frac{(b_i^u)^2}{2B_{ii}^u} \right) \frac{b_i^u}{B_{ii}^u} \mathbf{K}_{MM}^{-1} \mathbf{K}_{NM,i\cdot}^u \right]^\top \right\},$$

$$\frac{d\mathcal{F}_1}{d\boldsymbol{\Sigma}^u} = \sum_{u=1}^U \sum_{i=1}^{N^u} \left\{ -\Delta_i^u \left[ \mathbf{K}_{MM}^{-1} \mathbf{K}_{NM,i\cdot}^u \right]^\top \mathbf{K}_{NM,i\cdot}^u \mathbf{K}_{MM}^{-1} + \mathbb{I}(t_i^u \in \mathcal{T}^u) \left[ \left( -\tilde{G}' \left( -\frac{(b_i^u)^2}{2B_{ii}^u} \right) \frac{(b_i^u)^2}{2(B_{ii}^u)^2} + \frac{1}{B_{ii}^u} \right) \mathbf{K}_{MM}^{-1} \mathbf{K}_{NM,i\cdot}^u \right]^\top \mathbf{K}_{NM,i\cdot}^u \mathbf{K}_{MM}^{-1} \right\},$$

$$\frac{d\mathcal{F}_2}{d\boldsymbol{\mu}^u} = -\mathbf{K}_{MM}^{-1} (\boldsymbol{\mu}^u - \boldsymbol{\mu}_M^0),$$

$$\frac{d\mathcal{F}_2}{d\boldsymbol{\Sigma}^u} = -\frac{1}{2} \mathbf{K}_{MM}^{-1} + \frac{1}{2} \boldsymbol{\Sigma}^{u-1},$$

$$\frac{d\mathcal{F}_3}{d\boldsymbol{\mu}^u} = 0,$$

$$\frac{d\mathcal{F}_3}{d\boldsymbol{\Sigma}^u} = 0.$$

#### Variational M-step:

Updates for  $\boldsymbol{\mu}_M^0$  can be derived in closed form as follows,

$$\hat{\boldsymbol{\mu}}_M^0 = \frac{1}{\xi + U} \left( \xi \mathbf{g} + \sum_{u=1}^U \boldsymbol{\mu}^u \right).$$

Gradient methods are needed for updating other parameters (denoted as  $\theta_k$ ), including pseudo input positions and GP hyper-parameters, with key quantities summarized below:

$$\frac{d\mathcal{F}_1}{d\theta_k} = \sum_{u=1}^U \sum_{i=1}^{N^u} \left\{ \mathbb{I}(t_i^u \in \mathcal{T}^u) \left[ -\tilde{G}' \left( -\frac{(b_i^u)^2}{2B_{ii}^u} \right) \left( -\frac{1}{2(B_{ii}^u)^2} \right) \times \left\{ 2B_{ii}^u b_i^u (\boldsymbol{\mu}^u - \mathbf{g})^\top \frac{d\mathbf{K}_{MM}^{-1} \mathbf{K}_{NM,i\cdot}^u}{d\theta_k} - (b_i^u)^2 \frac{dB_{ii}^u}{d\theta_k} \right\} + \frac{1}{B_{ii}^u} \frac{dB_{ii}^u}{d\theta_k} \right] - \Delta_i^u \left[ 2b_i^u (\boldsymbol{\mu}^u - \mathbf{g})^\top \frac{d\mathbf{K}_{MM}^{-1} \mathbf{K}_{NM,i\cdot}^u}{d\theta_k} + \frac{dB_{ii}^u}{d\theta_k} \right] \right\},$$

$$\frac{dB_{ii}^u}{d\theta_k} = \frac{d\mathbf{K}_{NN,ii}}{d\theta_k} - \frac{d\mathbf{K}_{NM,i\cdot}^u \mathbf{K}_{MM}^{-1} \mathbf{K}_{NM,i\cdot}^u}{d\theta_k} + 2(\boldsymbol{\Sigma}^u \mathbf{K}_{MM}^{-1} \mathbf{K}_{NM,i\cdot}^u)^\top \frac{d\mathbf{K}_{MM}^{-1} \mathbf{K}_{NM,i\cdot}^u}{d\theta_k},$$

$$\frac{d\mathcal{F}_2}{d\theta^k} = -\frac{U}{2} \text{tr} \left( \mathbf{K}_{MM}^{-1} \frac{d\mathbf{K}_{MM}}{d\theta_k} \right) + \frac{1}{2} \text{tr} \left( \mathbf{K}_{MM}^{-1} \times \sum_{u=1}^U \left( \boldsymbol{\mu}^u \boldsymbol{\mu}^{u\top} + \boldsymbol{\Sigma}^u + \boldsymbol{\mu}_M^0 \boldsymbol{\mu}_M^{0\top} - 2\boldsymbol{\mu}^u \boldsymbol{\mu}_M^{0\top} \right) \mathbf{K}_{MM}^{-1} \frac{d\mathbf{K}_{MM}}{d\theta_k} \right),$$

$$\frac{d\mathcal{F}_3}{d\theta^k} = -\frac{1}{2} \text{tr} \left( \mathbf{K}_{MM}^{-1} \frac{d\mathbf{K}_{MM}}{d\theta_k} \right) + \frac{1}{2} \text{tr} \left( \xi \mathbf{K}_{MM}^{-1} (\boldsymbol{\mu}_M^0 - \mathbf{g})(\boldsymbol{\mu}_M^0 - \mathbf{g})^\top \mathbf{K}_{MM}^{-1} \frac{d\mathbf{K}_{MM}}{d\theta_k} \right).$$

### 2. Hierarchical Gaussian process construction

Using the construction in (2) and (3), we can integrate over  $\boldsymbol{\mu}_N^u$  to obtain the marginal prior distribution for  $\mathbf{f}_N^u$  as

$$\mathbf{f}_N^u \sim \mathcal{N} \left( \mathbf{g}, \left( 1 + \frac{1}{\xi} \right) \mathbf{K}_{NN} \right). \quad (\text{S1})$$

Using the construction in (9)-(11), we can integrate out  $f_M^u$  using (10) and (11), obtaining,

$$f_N^u | \mu_M^u \sim \mathcal{N} \left( \mathbf{g} + \mathbf{K}_{NM}^u \mathbf{K}_{MM}^{-1} (\mu_M^0 - \mathbf{g}), \right. \\ \left. \mathbf{K}_{NN}^u + \frac{1}{\xi} \left( \mathbf{K}_{NN}^u - \mathbf{K}_{NM}^u \mathbf{K}_{MM}^{-1} \mathbf{K}_{NM}^{u \top} \right) \right).$$

Then, integrating out  $\mu_M^0$  using (9), we can get the same marginal prior as in (S1),

$$f_N^u \sim \mathcal{N} \left( \mathbf{g}, \left( 1 + \frac{1}{\xi} \right) \mathbf{K}_{NN}^u \right). \quad (\text{S2})$$

The only difference between (S1) and (S2) is that we need a realization of the function at possible features from all tasks in (S1), while only the features from task  $u$  need to be specified in (S2).

### 3. Confluent hypergeometric functions

When  $|x|$  is small, for example  $|x| \leq 30$ , we use the power series to compute the confluent hypergeometric function:

$${}_1F_1(a, b, x) = \sum_{k=0}^{\infty} \frac{(a)_k x^k}{(b)_k k!},$$

where  $(a)_0 = 1$ ,  $(a)_k = \prod_{j=0}^{k-1} (a + j)$ . In practice, the summation can be terminated at a sufficiently large number to achieve a given error tolerance level.

When  $|x|$  is large, for example  $|x| > 30$ , we use the following computation (Thompson, 1997):

$${}_1F_1(a, b, x) = \frac{\Gamma(b)(-x)^{-a}}{\Gamma(b-1)} \sum_{k=0}^{\infty} \frac{(a)_k (a+a-b)_k}{k! (-x)^k}.$$

Having  ${}_1F_1(a, b, x)$ , the gradient  $\tilde{G}(x) = G(0, \frac{1}{2}, z)$  can be numerically computed, where  $G(a, b, x) = \frac{\partial {}_1F_1(a, b, x)}{\partial a}$  (Ancarani & Gasaneo, 2008).

Finally, the expectation needed to compute  $\mathcal{F}_1$  during variational E-step can be estimated as (Lloyd et al., 2014):

$$\mathbb{E}[\log(f_{N,i}^u)^2] = -\tilde{G}\left(-\frac{b_i^u}{2B_{ii}^u}\right) + \log\left(\frac{B_{ii}^u}{2}\right) - \text{const}.$$

### References

- Ancarani, L. U. and Gasaneo, G. Derivatives of any order of the confluent hypergeometric function. *Journal of Mathematical Physics*, 49, 2008.
- Lloyd, Chris, Gunter, Tom, Osborne, Michael A., and Roberts, Stephen J. Variational inference for Gaussian process modulated Poisson processes. *arXiv:1411.0254*, 2014.

Thompson, William J. *Atlas for Computing Mathematical Functions: An Illustrated Guide for Practitioners with Programs in FORTRAN and Mathematica with Cdrom*. John Wiley & Sons, Inc., 1997.
